# Supplementary material for: Convergent relaxation of molecular constraint in herbivores reveals the changing role of liver and kidney functions across mammalian diets
Source: HighWire-hosted journal article supplement (doi:10.1101/gr.278930.124), 2024-11-22
Supplement: Supplemental_Figures.pdf [file Supplemental_Figures.pdf]

# 1 Supplemental Figures

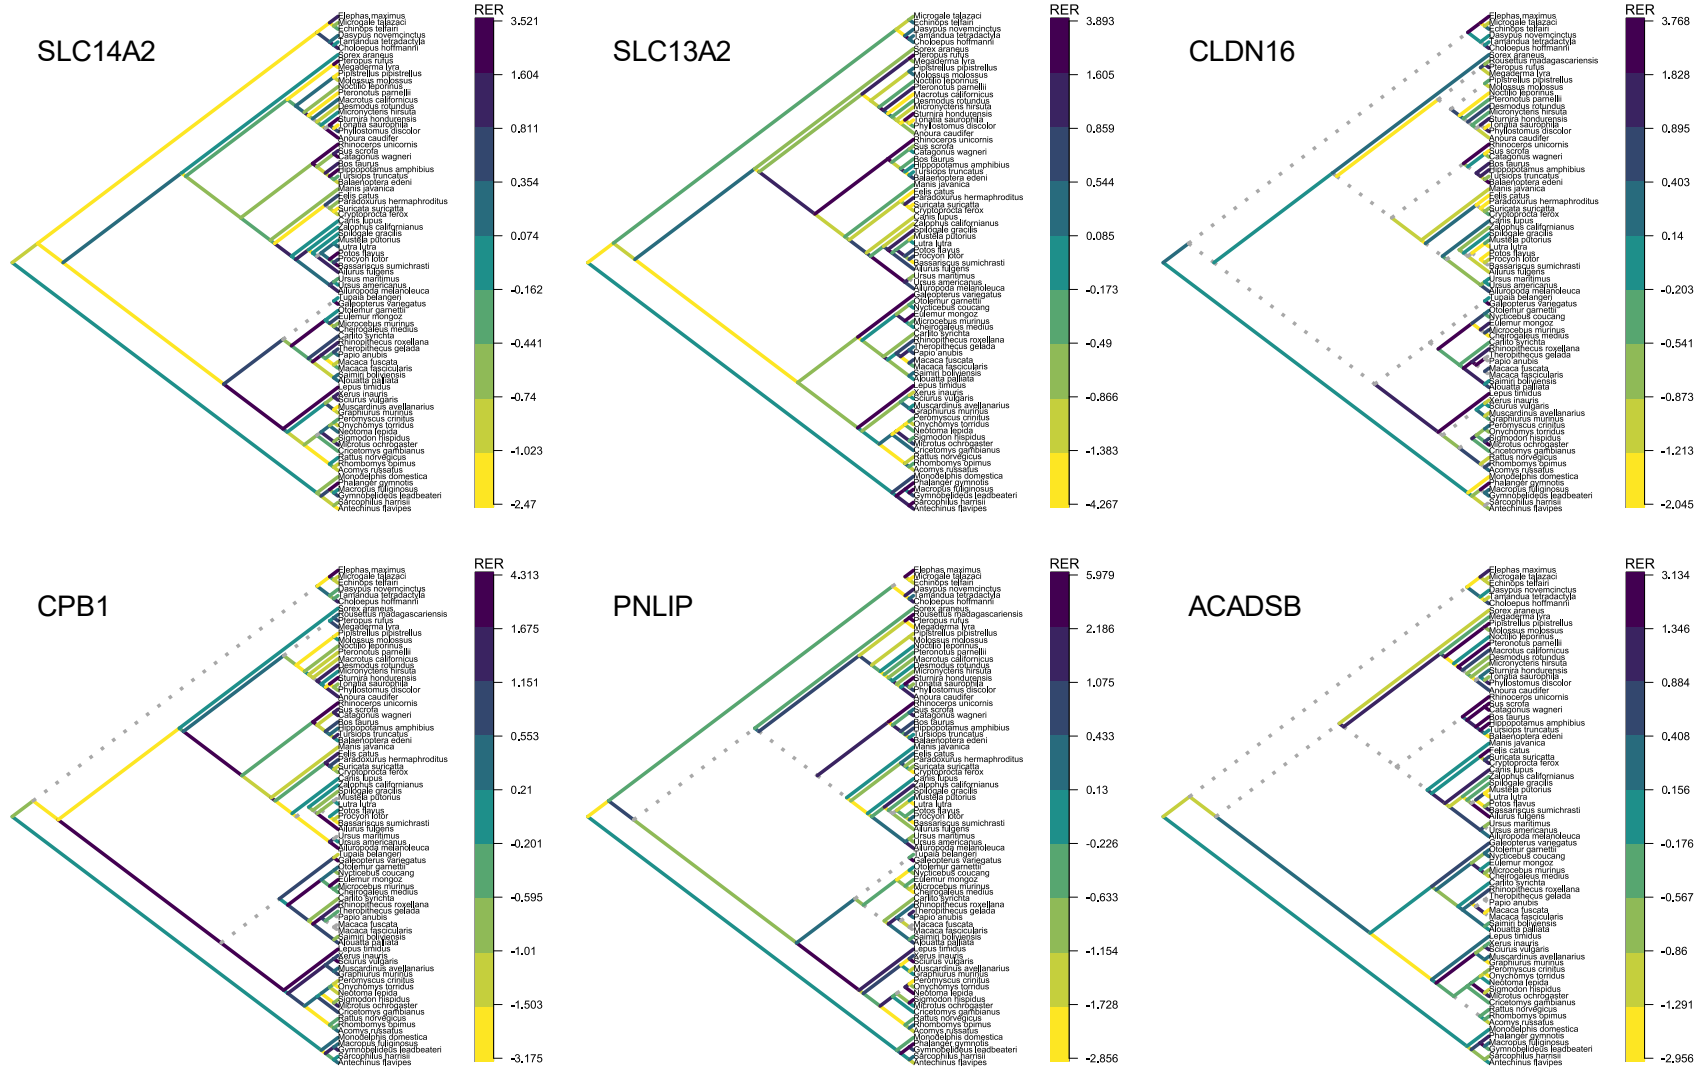

**Figure S1.** Relative evolutionary rates (RERs) across the mammalian phylogeny for genes significantly associated with change in carnivory score. Branch colors represent the RER for a given gene in each part of the phylogeny. Purple and yellow branches indicate positive and negative RERs, respectively. Gray dashed lines represent branches that were excluded from our analyses due to default branch length filtering in RERconverge, which set the shortest 5% of branches across all gene trees to N/A. In each gene, positive and negative RERs are distributed throughout the phylogeny.

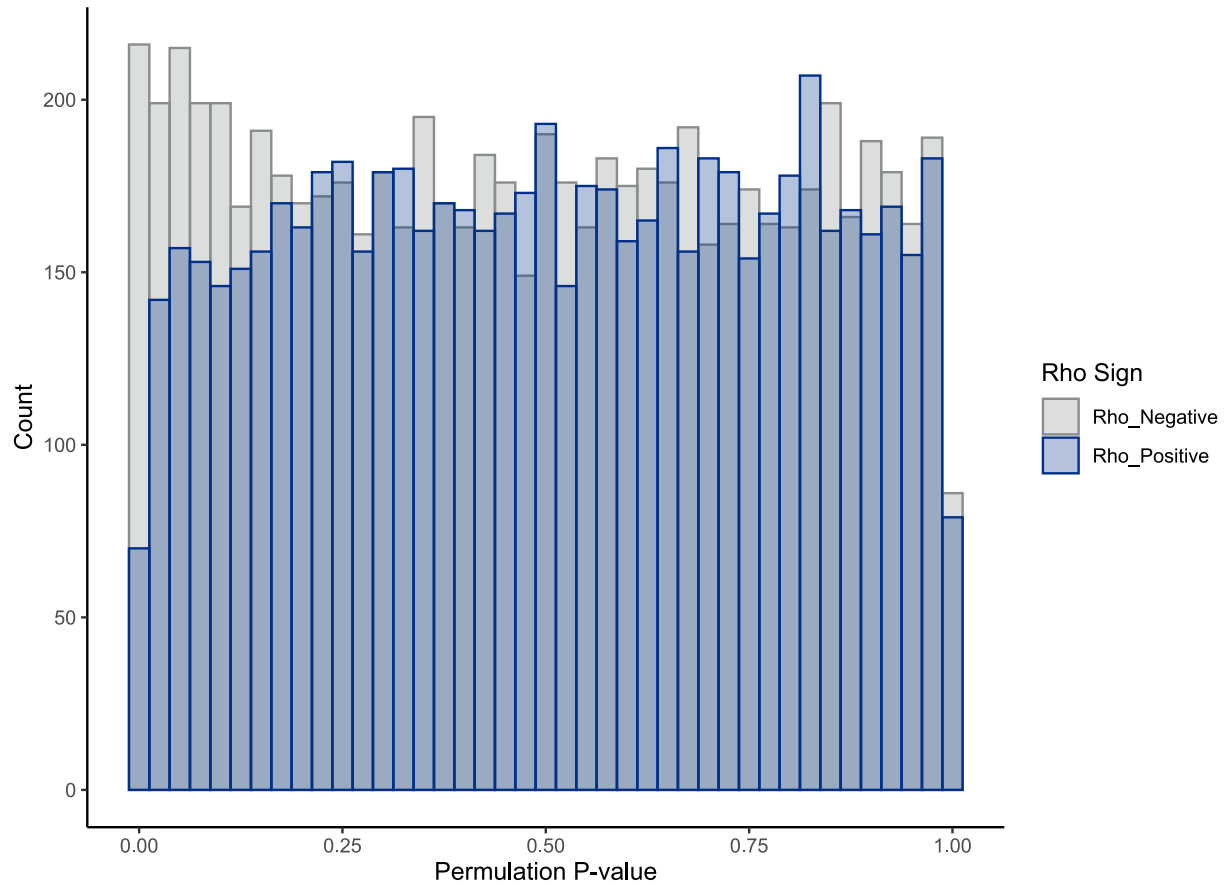

8

9 **Figure S2.** Significant differences in the distribution of empirical, permutation-based  $P$ -values for  
 10 positive and negative associations between gene relative evolutionary rates (RERs) and carnivory  
 11 score (Mann-Whitney U test,  $AUC=0.523$ ,  $P=2.16 \times 10^{-6}$ ). Our analysis showed reduced power to  
 12 detect positive associations between RER and change in carnivory, as indicated by fewer low  $P$ -  
 13 values being generated during permutation for genes with a positive correlation.

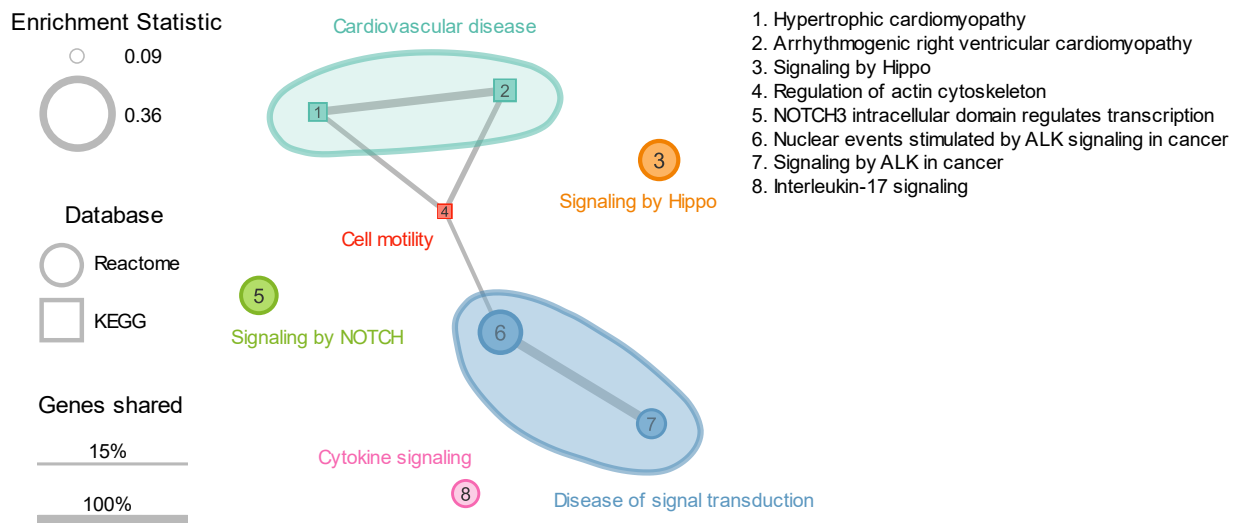

14

15 **Figure S3.** Significantly enriched gene pathways (n=8) for genes whose evolutionary rates are  
 16 positively correlated with carnivory score. Each circle or square represents a gene pathway. Circles  
 17 and squares represent pathways from the Reactome and KEGG databases, respectively. The size  
 18 of the shape represents the magnitude of the difference between the distribution of test statistics  
 19 for genes in that pathway and the distribution for all other genes. Larger shapes, representing  
 20 pathways with larger positive correlation statistics, indicate greater reductions in evolutionary  
 21 constraint as carnivory score increases. The width of lines connecting pathways represents the  
 22 proportion of shared genes in the smaller gene set. Colors represent the broad functional categories  
 23 that the pathways occupy.

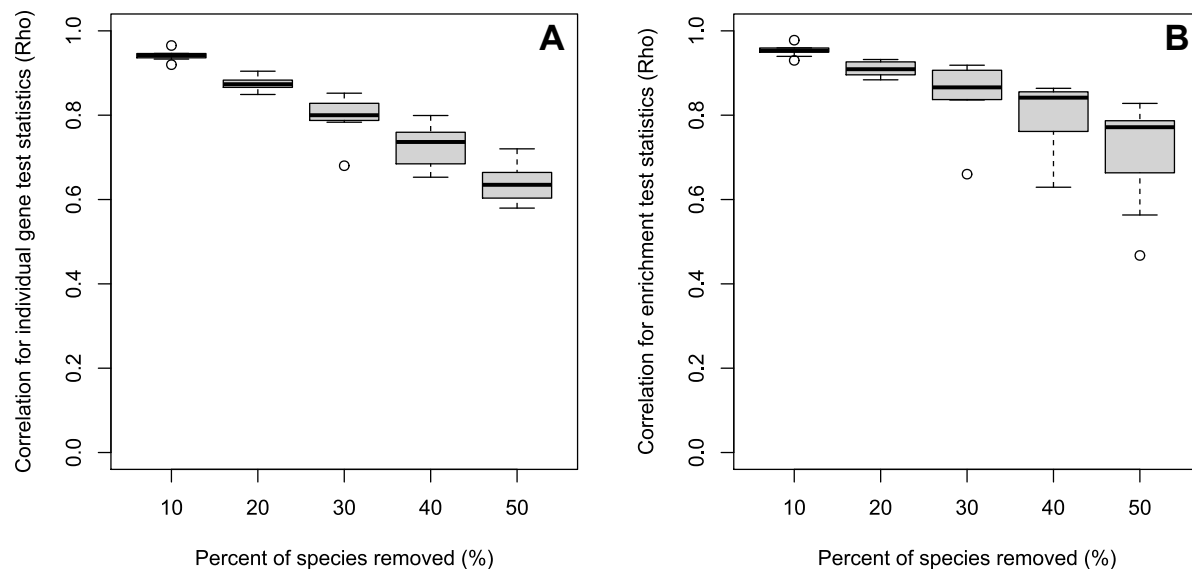

**Figure S4.** Correlations between RERconverge results using our full species list and using species subsets where 10, 20, 30, 40, or 50 percent of species have been randomly removed. For each percent of species removed, we created 10 random subsets. Boxes represent the distribution of correlation values (Pearson's correlation coefficient, rho) between the original results and the results with a given percent of species removed. (A) Correlations between gene correlation statistics. (B) Correlations between gene set enrichment statistics.

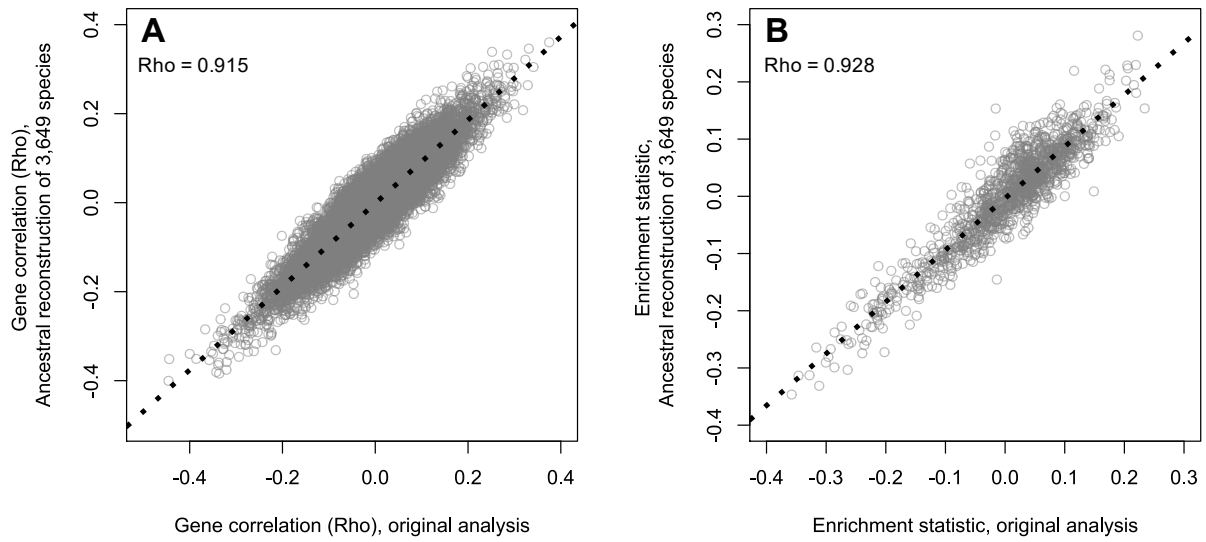

**Figure S5.** Correlations between RERconverge results using the original ancestral state reconstruction method built into RERconverge and a modified reconstruction method. For the modified method, we performed fast estimation of maximum likelihood ancestral states (Revell 2012) on a larger tree of 3,649 species for which we could obtain diet data from EltonTraits (Wilman et al. 2014). We then pruned this reconstruction to our study species and used it as input in the RERconverge analysis. Correlations were calculated using Pearson's correlation coefficient ( $\rho$ ). Dashed lines indicate the regression line. (A) Correlation between gene correlation statistics. (B) Correlation between gene set enrichment statistics.

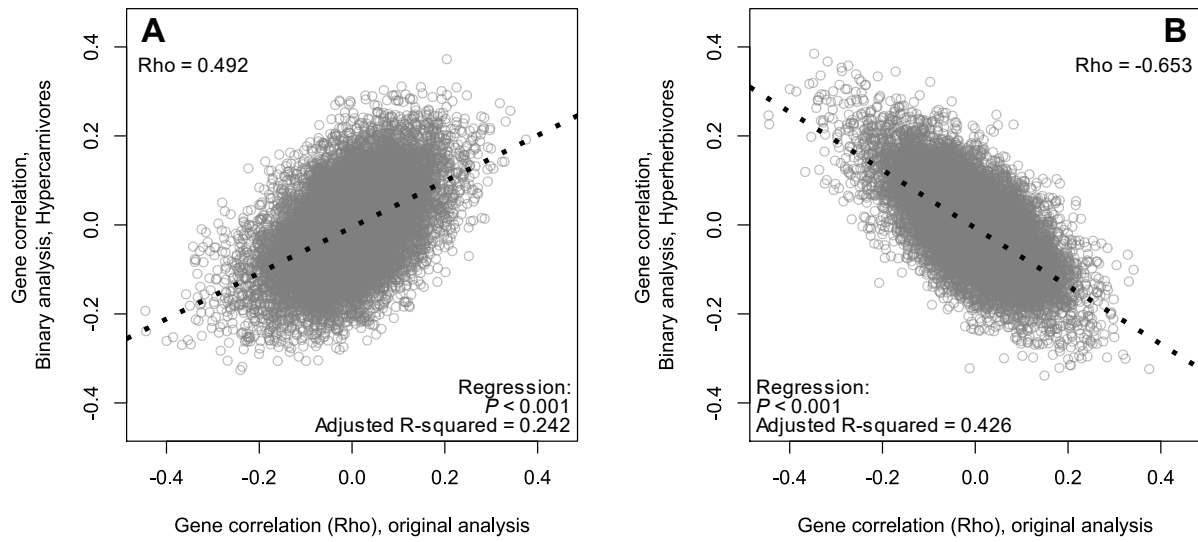

**Figure S6.** Correlations between the test statistics for the continuous and binary RERconverge analyses. Inset rho values represent the Pearson correlation coefficient between the two analyses. Dashed lines indicate the regression line. (A) Correlation between the individual gene test statistics from the original continuous analysis and the binary analysis with hypercarnivores (carnivory scores  $\geq 90$ ) as foreground. (B) Correlation between the individual gene test statistics from the original continuous analysis and the binary analysis with hyperherbivores (carnivory scores  $\leq 10$ ) as foreground.

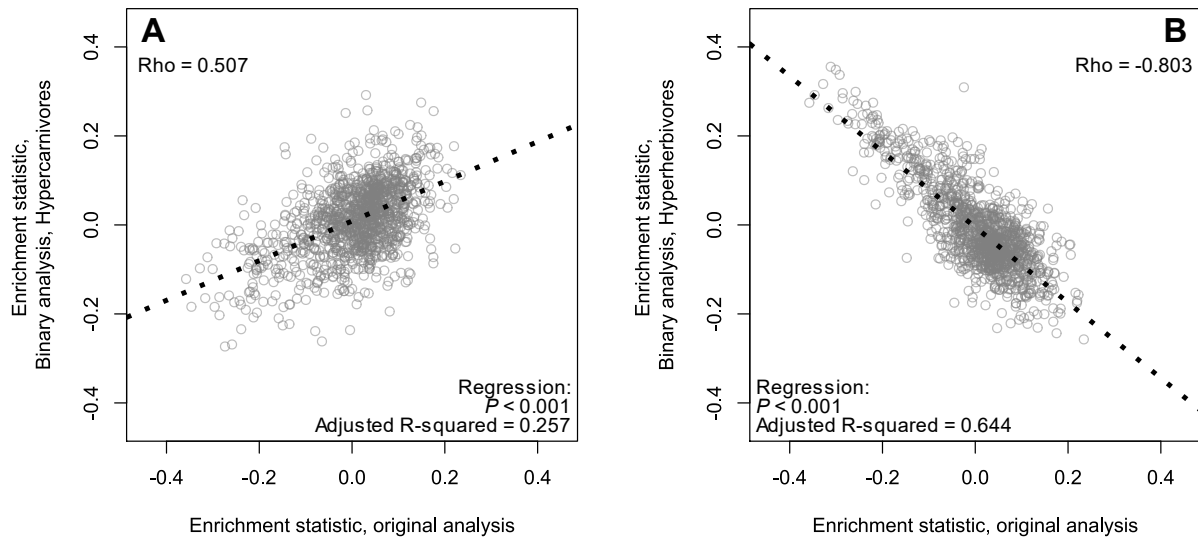

51

52 **Figure S7.** Correlations between the gene pathway enrichment statistics for the continuous and  
 53 binary RERconverge analyses. Inset rho values represent the Pearson correlation coefficient  
 54 between the two analyses. (A) Correlation between the enrichment statistics from the original  
 55 continuous analysis and the binary analysis with hypercarnivores (carnivory scores  $\geq 90$ ) as  
 56 foreground. (B) Correlation between the enrichment statistics from the original continuous analysis  
 57 and the binary analysis with hyperherbivores (carnivory scores  $\leq 10$ ) as foreground.

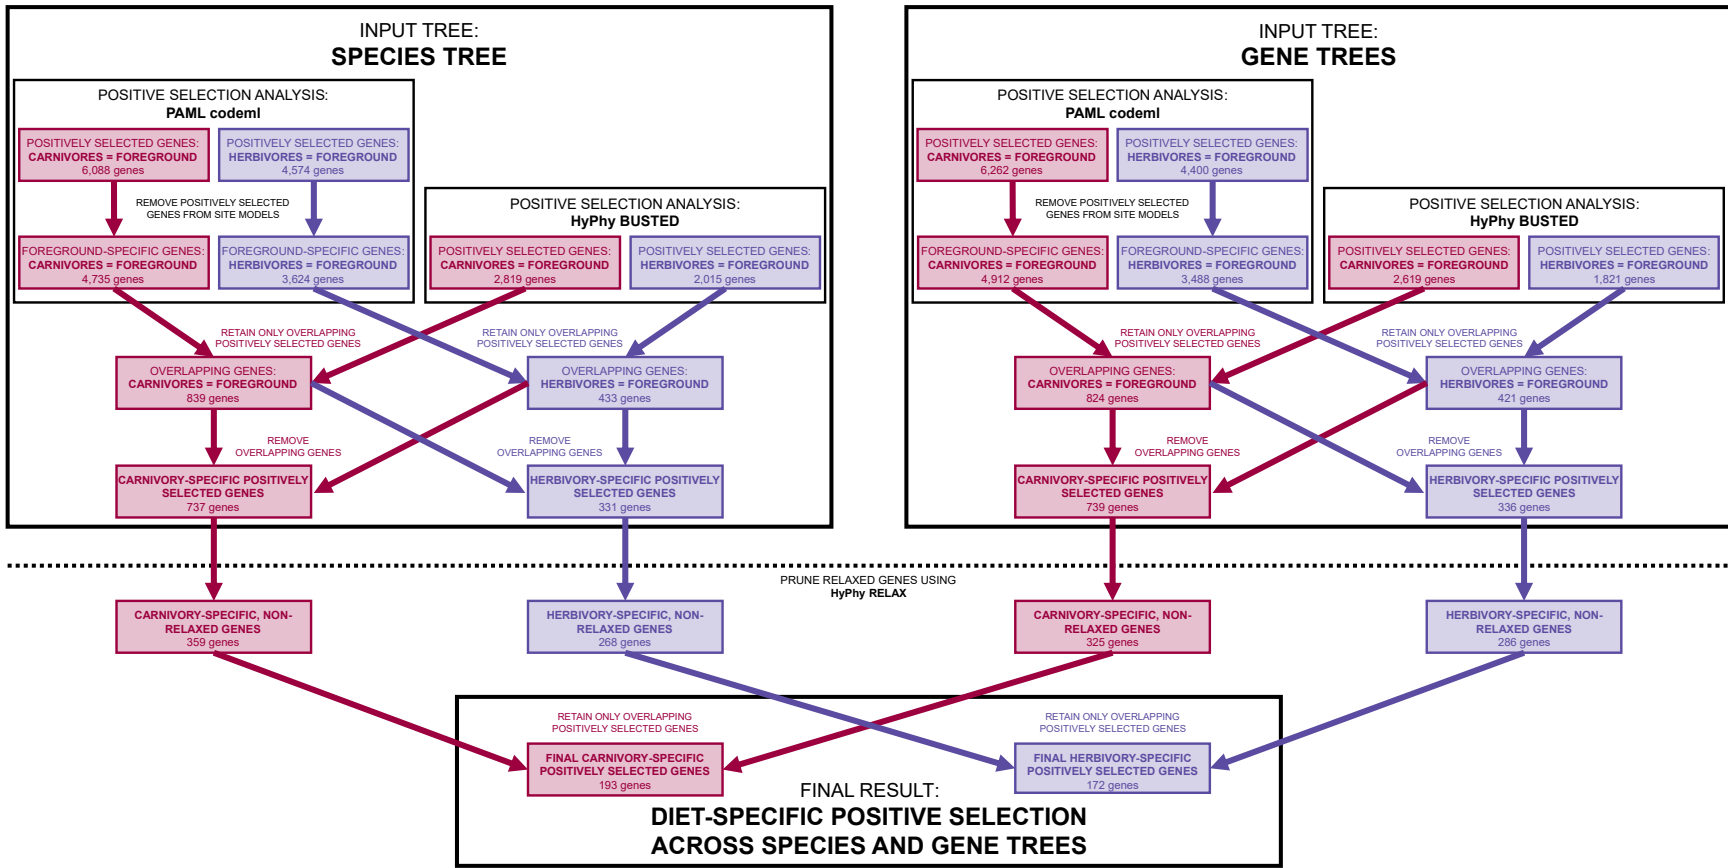

**Figure S8.** Conservative strategy for generating final lists of positively selected genes associated with carnivory and herbivory in mammals. We tested 15,117 genes for positive selection in carnivores (species with carnivory scores  $\geq 90$ ) and herbivores (species with carnivory scores  $\leq 10$ ) separately, using both codeml from PAML (Yang 2007) and BUSTED from HyPhy (Murrell et al. 2015; Pond et al. 2020). To account for the impact of gene tree discordance, we performed our positive selection analyses using both the species tree (Upham et al. 2019) and gene trees inferred using RAxML (Stamatakis 2014). We only considered a gene to have experienced diet-associated positive selection when it produced a significant result in both our codeml and BUSTED analyses, and if we got this result using both the species and gene trees. As an additional filtering step, we tested the genes returned by codeml and BUSTED for relaxed selection using RELAX (Wertheim et al. 2015) and excluded any genes showing significant relaxation in the foreground species from our final gene lists. The final products of this process were two conservative lists representing positively selected genes in the most carnivorous and herbivorous mammals, respectively (Tables S7, S8).



71   **Literature Cited**

- 72   Murrell B, Weaver S, Smith MD, Wertheim JO, Murrell S, Aylward A, Eren K, Pollner T, Martin  
73   DP, Smith DM *et al.* 2015. Gene-wide identification of episodic selection. *Mol Biol Evol* **32**: 1365-  
74   1371.
- 75   Pond SLK, Poon AFY, Velazquez R, Weaver S, Hepler NL, Murrell B, Shank SD, Magalis BR,  
76   Bouvier D, Nekrutenko A *et al.* 2020. HyPhy 2.5—A customizable platform for evolutionary  
77   hypothesis testing using phylogenies. *Mol Biol Evol* **37**: 295-299.
- 78   Revell LJ. 2012. phytools: an R package for phylogenetic comparative biology (and other things).  
79   *Methods Ecol Evol* **3**: 317-223.
- 80   Stamatakis A. 2014. RAxML version 8: a tool for phylogenetic analysis and post-analysis of large  
81   phylogenies. *Bioinformatics* **30**: 1312-1313.
- 82   Upham NS, Esselstyn JA, and Jetz W. 2019. Inferring the mammal tree: Species-level sets of  
83   phylogenies for questions in ecology, evolution, and conservation. *PloS Biol* **17**: e3000494.
- 84   Wertheim JO, Murrell B, Smith MD, Kosakovsky Pond SL, and Scheffler K. 2015. RELAX:  
85   Detecting relaxed selection in a phylogenetic framework. *Mol Biol Evol* **32**: 820-832.
- 86   Wilman H, Belmaker J, Simpson J, de la Rosa C, Rivadeneira MM, and Jetz W. 2014. EltonTraits  
87   1.0: Species-level foraging attributes of the world's birds and mammals. *Ecology* **95**: 2027.
- 88   Yang Z. 2007. PAML 4: phylogenetic analysis by maximum likelihood. *Mol Biol Evol* **24**: 1586-  
89   1591.

90
